# Supplementary material for: Evolution of sequence traits of prion-like proteins linked to amyotrophic lateral sclerosis (ALS)
Source: PeerJ journal article supplement (doi:10.7717/peerj.14417), 2022-11-17

**Figure Legend:**

Total counts of sequences containing single-residue CB regions with  $P \leq 1 \times 10^{-4}$  for (A) FUS, (B) TAF15 and (C) EWSR1 orthologs. The CB regions are labelled {x}, where x is the biasing residue. These are counts of sequences, not of CB regions.

(A)

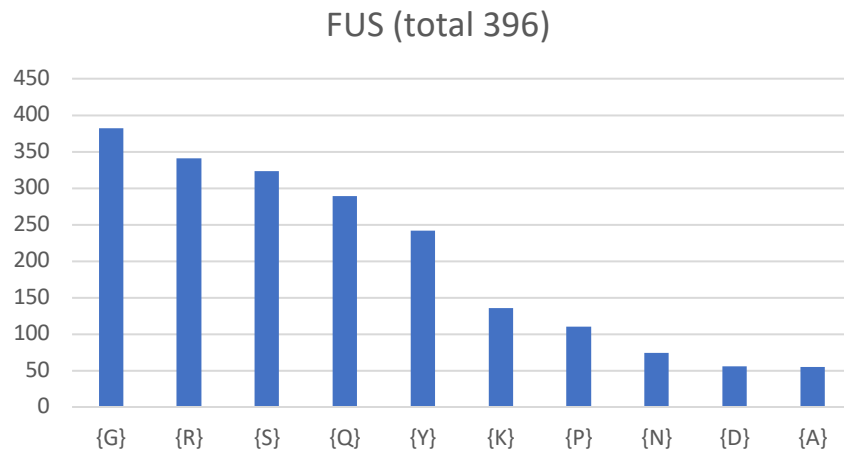

(B)

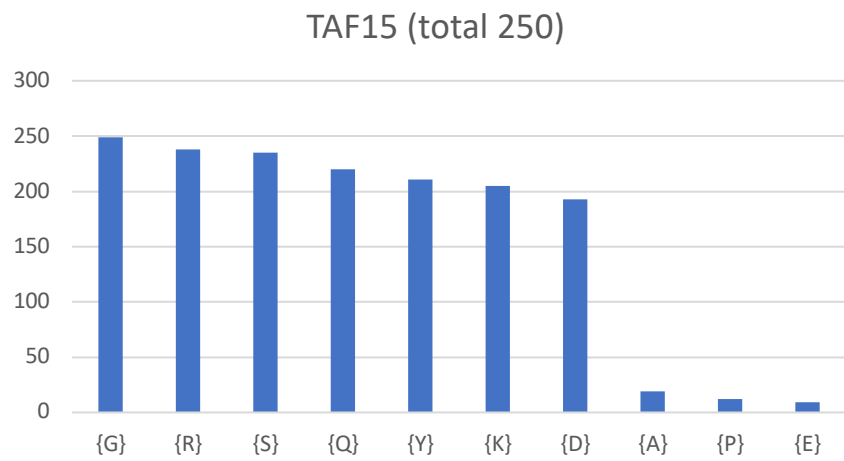

(C)

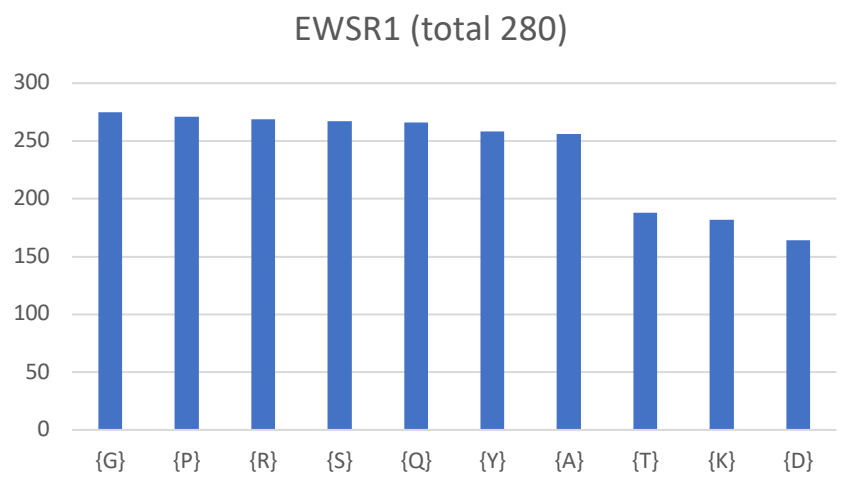

Supplement: Suppl-File-3-fLPS-results.pdf [file Suppl-File-3-fLPS-results.pdf]
