# Supplementary material for: Evolution of sequence traits of prion-like proteins linked to amyotrophic lateral sclerosis (ALS)
Source: PeerJ journal article supplement (doi:10.7717/peerj.14417), 2022-11-17
Supplement: Suppl-File-4-fLPS-bias-plots.pdf [file Suppl-File-4-fLPS-bias-plots.pdf]

**Figure Legend:**

Plots of CB region length (in residues) versus  $-\log(\text{P-value})$  for the six most common single-residue biases for each of FUS, TAF15 and EWSR1 respectively. The plots for each protein are arrayed on one page each. The P-values are from the fLPS program.

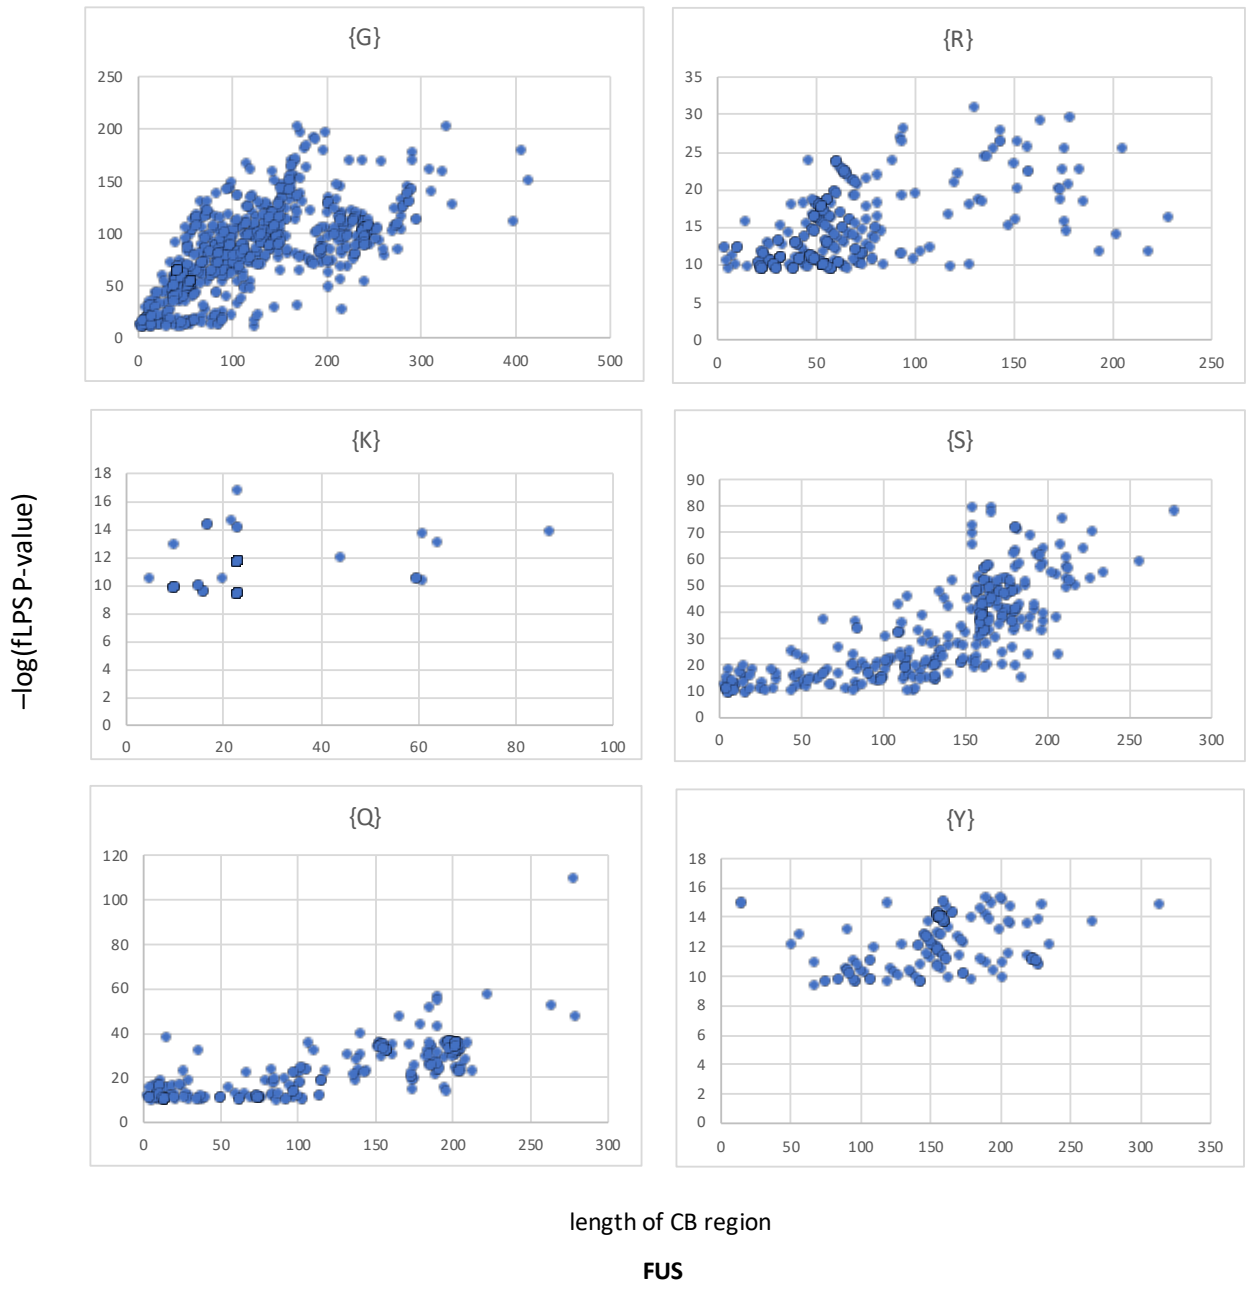

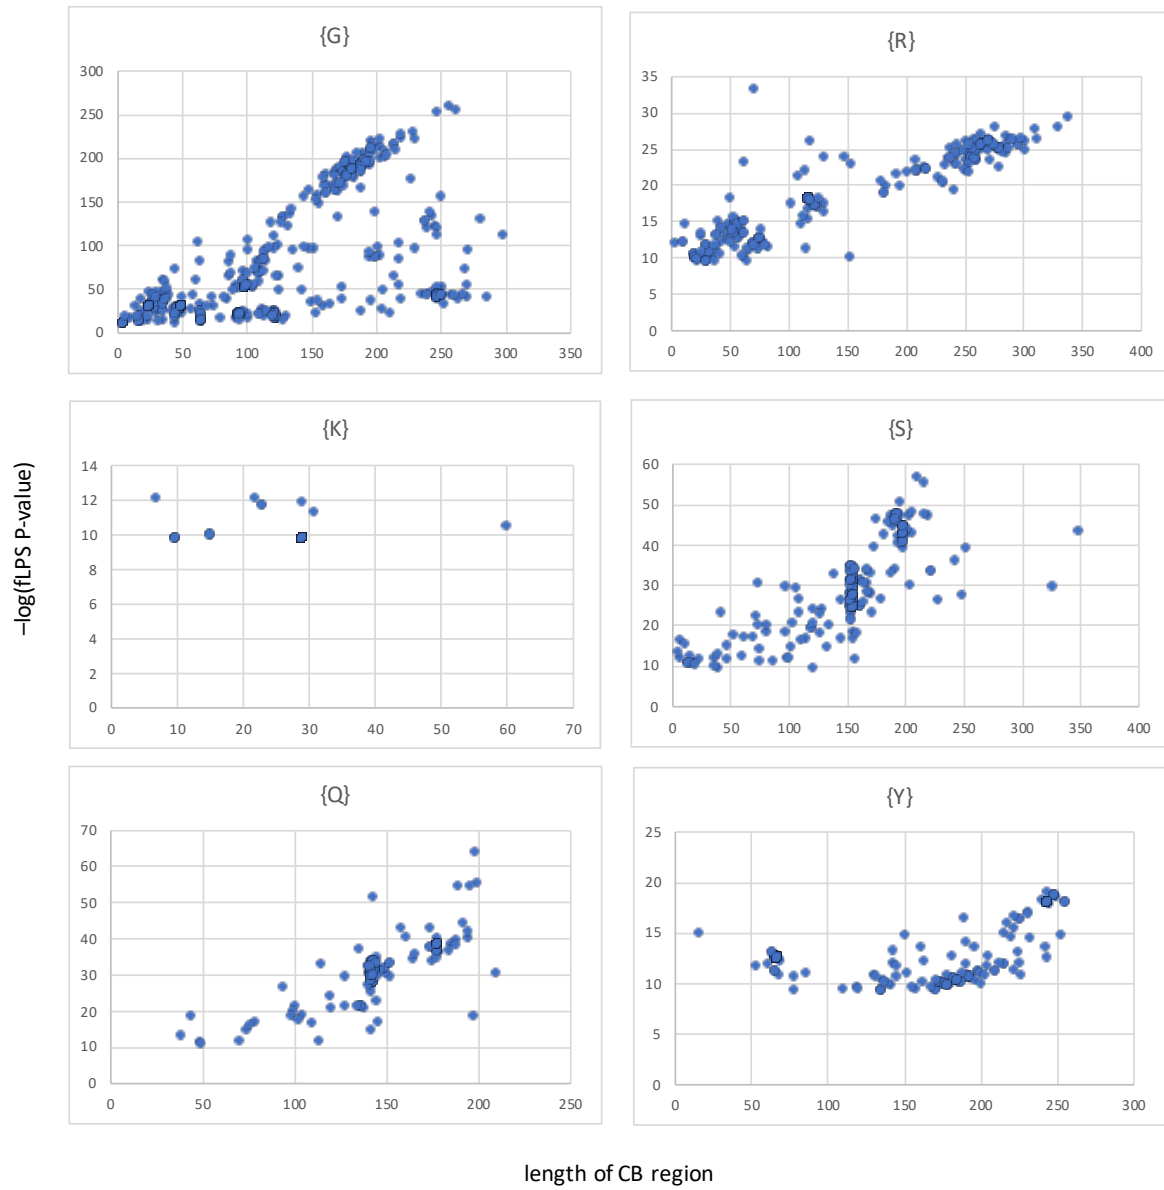

length of CB region

TAF15

length of CB

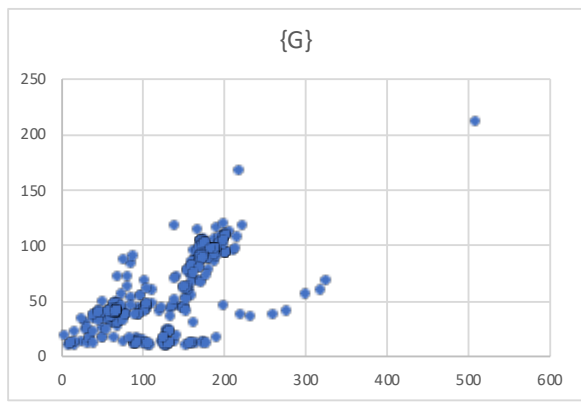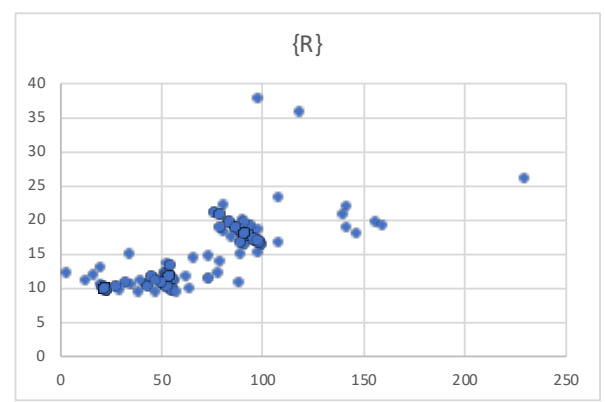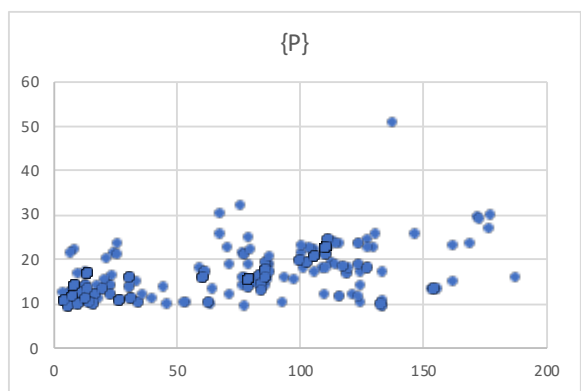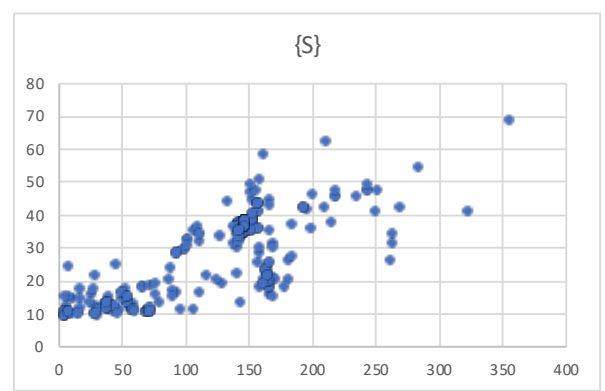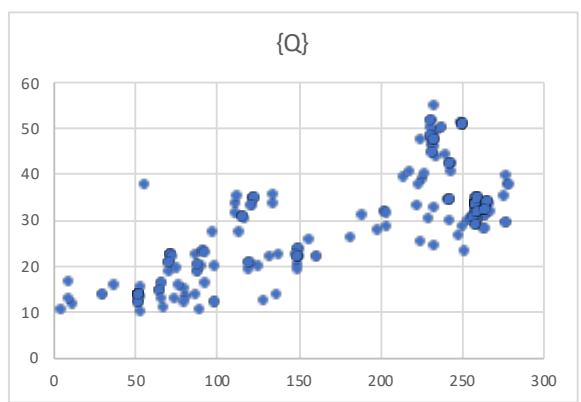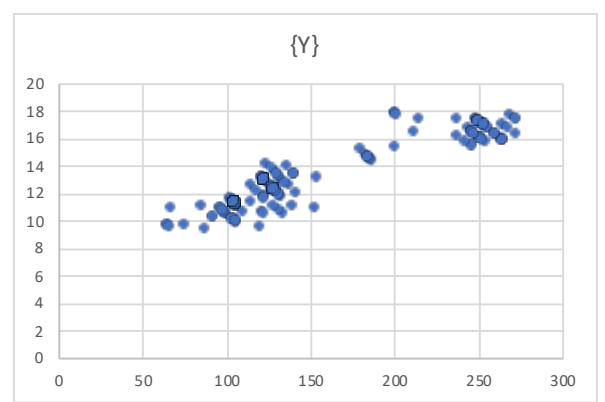

length of CB region

EWSR1
